# Supplementary material
Source: publisher site journal article supplement (http://e-cmh.org/upload/media/cmh-2023-0343-Supplementary-Table-10.pdf)
Supplement: Supplementary file 1 [file cmh-2023-0343-Supplementary-Table-10.pdf]

**Supplementary Table 10.** Summary of drug repositioning for HCC and supporting evidence

| Drug         | P-value  | Hepatotoxicity | Experimental evidence for HCC | Experimental evidence for other liver diseases | Clinical evidence for HCC | Clinical evidence for other liver diseases |
|--------------|----------|----------------|-------------------------------|------------------------------------------------|---------------------------|--------------------------------------------|
| Docetaxel    | 0.00039  | None           | 18851881                      | 29251522                                       | 16645329                  |                                            |
| Toziluzumab  | 0.001835 | Exist          |                               |                                                |                           |                                            |
| Verteporfin  | 0.002196 | None           | 33655469                      |                                                |                           |                                            |
| Calcitriol   | 0.003071 | None           | 35611989                      | 25712522                                       |                           | 33341312                                   |
| Melphalan    | 0.005589 | None           | 19709125                      |                                                | 34716470                  |                                            |
| Lamivudine   | 0.006131 | Exist          |                               |                                                |                           |                                            |
| Etonogestrel | 0.009841 | None           |                               |                                                |                           |                                            |
| Latanoprost  | 0.010654 | None           |                               |                                                |                           |                                            |
| Furosemide   | 0.011742 | None           |                               |                                                |                           | 32833292                                   |
| Metoprolol   | 0.011973 | None           | 30008820                      |                                                |                           |                                            |
| Thrombin     | 0.013886 | None           | 20890897                      | 25138021                                       |                           |                                            |
| Somatostatin | 0.015647 | None           | 19478472; 19590186            | 18173562; 15949036                             | 21804474                  | 26129925; 34873228                         |
| Disulfiram   | 0.020463 | Exist          |                               |                                                |                           |                                            |
| Cyclosporine | 0.020905 | Exist          |                               |                                                |                           |                                            |
| Thalidomide  | 0.028647 | None           | 16313753                      |                                                | 22346253                  |                                            |

The numbers shown in the table represent PubMed Identifier (PMID) numbers, which provide evidence for the foundational research and clinical studies supporting the therapeutic effects of the respective drugs.  
 HCC, hepatocellular carcinoma.
